# CORRECTION

## Correction: Gender-Specificity of Initial and Controlled Visual Attention to Sexual Stimuli in Androphilic Women and Gynephilic Men

The *PLOS ONE* Staff

In the Funding section, the name of the “Natural Sciences and Engineering Research Council of Canada Discover Grant” is listed incorrectly. The correct funder name is: Natural Sciences and Engineering Research Council of Canada Discovery Grant.

### Reference

1. Dawson SJ, Chivers ML (2016) Gender-Specificity of Initial and Controlled Visual Attention to Sexual Stimuli in Androphilic Women and Gynephilic Men. *PLoS ONE* 11(4): e0152785. doi: [10.1371/journal.pone.0152785](https://doi.org/10.1371/journal.pone.0152785) PMID: [27088358](https://pubmed.ncbi.nlm.nih.gov/27088358/)

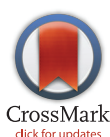

### OPEN ACCESS

**Citation:** The *PLOS ONE* Staff (2016) Correction: Gender-Specificity of Initial and Controlled Visual Attention to Sexual Stimuli in Androphilic Women and Gynephilic Men. *PLoS ONE* 11(5): e0155651. doi:10.1371/journal.pone.0155651

**Published:** May 10, 2016

**Copyright:** © 2016 The PLOS ONE Staff. This is an open access article distributed under the terms of the [Creative Commons Attribution License](https://creativecommons.org/licenses/by/4.0/), which permits unrestricted use, distribution, and reproduction in any medium, provided the original author and source are credited.
